# Supplementary material for: Association of Field Position and Career Length With Risk of Neurodegenerative Disease in Male Former Professional Soccer Players
Source: PubMed Central journal article supplement (PMC8329793; doi:10.1001/jamaneurol.2021.2403), 2021-08-02
Supplement: jamaneurol-e212403-s001.pdf [file jamaneurol-e212403-s001.pdf]

## Supplemental Online Content

Russell ER, Mackay DF, Stewart K, MacLean JA, Pell JP, Stewart W. Association of field position and career length with risk of neurodegenerative disease in male former professional soccer players. *JAMA Neurol*. Published online August 2, 2021. doi:10.1001/jamaneurol.2021.2403

**eTable 1.** Player position and risk of neurodegenerative disease

**eTable 2.** Career length and risk of neurodegenerative disease

**eTable 3.** Date of birth and risk of neurodegenerative disease

This supplemental material has been provided by the authors to give readers additional information about their work.

**eTable 1: Player position and risk of neurodegenerative disease**

|                      | <b>Former Soccer Players</b> | <b>Matched Population Controls</b> | <b>Hazard Ratio (95% CI)</b> | <b>P*</b> | <b>Subhazard ratio (95% CI)</b> | <b>P**</b> |
|----------------------|------------------------------|------------------------------------|------------------------------|-----------|---------------------------------|------------|
|                      | <b>n/total n (%)</b>         | <b>n/total n (%)</b>               |                              |           |                                 |            |
| <b>All players</b>   | 386/7,676 (5.0)              | 366/23,028 (1.6)                   | 3.66 (2.88, 4.65)            | <0.001    | 3.90 (3.25, 4.66)               | <0.001     |
| <b>Goalkeeper</b>    | 19/598 (3.2)                 | 34/1,794 (1.9)                     | 1.83 (0.93, 3.60)            | 0.079     | 1.09 (0.49, 2.44)               | 0.883      |
| <b>Outfield</b>      | 271/4,813 (5.6)              | 234/14,439 (1.6)                   | 3.83 (3.11, 4.73)            | <0.001    | 4.48 (3.67, 5.48)               | <0.001     |
| Defender             | 81/1,347 (6.0)               | 55/4,041 (1.4)                     | 4.98 (3.18, 7.79)            | <0.001    | 5.56 (3.63, 8.49)               | <0.001     |
| Midfield             | 57/1,129 (5.0)               | 40/3,387 (1.2)                     | 4.59 (2.73, 7.71)            | <0.001    | 6.04 (3.63, 10.05)              | <0.001     |
| Forward              | 133/2,337 (5.7)              | 139/7,011 (2.0)                    | 2.79 (2.06, 3.78)            | <0.001    | 3.37 (2.51, 4.51)               | <0.001     |
| <b>Multiposition</b> | 45/1,211 (3.7)               | 30/3,633 (0.8)                     | 4.94 (2.79, 8.76)            | <0.001    | 5.27 (2.99, 9.30)               | <0.001     |

\*Cox proportional hazards regression; \*\*Adjusted for the competing risk of deaths from causes other than neurodegenerative disease.

**eTable 2: Career length and risk of neurodegenerative disease**

|                     | <b>Former Soccer<br/>Players</b> | <b>Matched<br/>Population<br/>Controls</b> | <b>Hazard Ratio<br/>(95% CI)</b> | <b><i>P</i>*</b> | <b>Subhazard ratio<br/>(95% CI)</b> | <b><i>P</i>**</b> |
|---------------------|----------------------------------|--------------------------------------------|----------------------------------|------------------|-------------------------------------|-------------------|
|                     | <b>n/total n (%)</b>             | <b>n/total n (%)</b>                       |                                  |                  |                                     |                   |
| <b>1-5 years</b>    | 70/2,037 (3.4)                   | 81/6,111 (1.3)                             | 2.26 (1.51, 3.37)                | <0.001           | 2.53 (1.74, 3.67)                   | <0.001            |
| <b>6-10 years</b>   | 73/1,535 (4.8)                   | 62/4,605 (1.3)                             | 4.61 (2.97, 7.17)                | <0.001           | 4.75 (3.07, 7.37)                   | <0.001            |
| <b>11-15 years</b>  | 96/1,354 (7.1)                   | 82/4,062 (2.0)                             | 4.28 (2.89, 6.35)                | <0.001           | 5.09 (3.52, 7.37)                   | <0.001            |
| <b>&gt;15 years</b> | 72/978 (7.4)                     | 36/2,934 (1.2)                             | 5.20 (3.17, 8.51)                | <0.001           | 8.65 (5.19, 14.42)                  | <0.001            |

\*Cox proportional hazards regression; \*\*Adjusted for the competing risk of deaths from causes other than neurodegenerative disease

**eTable 3: Date of birth and risk of neurodegenerative disease**

|                  | <b>Former Soccer<br/>Players</b> | <b>Matched<br/>Population<br/>Controls</b> | <b>Hazard Ratio<br/>(95% CI)</b> | <b><i>P</i>*</b> | <b>Subhazard ratio<br/>(95% CI)</b> | <b><i>P</i>**</b> |
|------------------|----------------------------------|--------------------------------------------|----------------------------------|------------------|-------------------------------------|-------------------|
|                  | <b>n/total n (%)</b>             | <b>n/total n (%)</b>                       |                                  |                  |                                     |                   |
| <b>1910-1929</b> | 61/181 (33.7)                    | 53/543 (9.8)                               | 3.78 (2.26, 6.35)                | <0.001           | 5.49 (3.11, 9.68)                   | <0.001            |
| <b>1930-1949</b> | 219/1,559 (14.0)                 | 188/4,677 (4.0)                            | 3.66 (2.85, 4.69)                | <0.001           | 4.14 (3.29, 5.22)                   | <0.001            |
| <b>1950-1969</b> | 34/3,402 (1.0)                   | 22/10,206 (0.2)                            | 5.11 (2.77, 9.43)                | <0.001           | 6.22 (3.41, 11.37)                  | <0.001            |

\*Cox proportional hazards regression; \*\*Adjusted for the competing risk of deaths from causes other than neurodegenerative disease
